# Supplementary material for: Heterogeneous photocatalytic ozonation of ciprofloxacin using synthesized titanium dioxide nanoparticles on a montmorillonite support: parametric studies, mechanistic analysis and intermediates identification
Source: Royal Society of Chemistry journal article supplement (doi:10.1039/c6ra19191f), 2016-01-01
Supplement: c6ra19191f1.pdf [file c6ra19191f1.pdf]

## Supplementary information

### Heterogeneous photocatalytic ozonation of ciprofloxacin using synthesized titanium dioxide nanoparticles on montmorillonite support: Parametric studies, mechanistic analysis and intermediates identification

**Aydin Hassani,<sup>a</sup> Alireza Khataee,<sup>b,\*</sup> Semra Karaca,<sup>a,\*\*</sup> Mehrangiz Fathinia<sup>b</sup>**

<sup>a</sup> Department of Chemistry, Faculty of Science, Atatürk University, 25240 Erzurum, Turkey

<sup>b</sup> Research Laboratory of Advanced Water and Wastewater Treatment Processes, Department of Applied Chemistry, Faculty of Chemistry, University of Tabriz, 51666-16471 Tabriz, Iran

\*Corresponding author (communicator):

Tel.: +98 41 33393165; Fax: +98 41 33340191.

E-mail address: a\_khataee@tabrizu.ac.ir

\*\* Corresponding author:

Tel: +90 442 2314435; Fax: +90 442 2360948

E-mail address: skaraca@atauni.edu.tr

**Table S1.** The concentration of dissolved ozone in the solution media toward the applied ozone inlet flow rates after 30 min of reaction.

| <b>Ozone inlet flow rate (L h<sup>-1</sup>)</b> | <b>Dissolved ozone concentration (mg L<sup>-1</sup>)</b> |
|-------------------------------------------------|----------------------------------------------------------|
| 1                                               | 0.04                                                     |
| 2                                               | 0.08                                                     |
| 3                                               | 0.12                                                     |
| 4                                               | 0.16                                                     |
| 5                                               | 0.21                                                     |
| 6                                               | 0.33                                                     |

**Table S2.** Chemical composition of MMT and TiO<sub>2</sub>/MMT samples.

| Sample                | Chemical compositions (wt.%) |                                |                                |                  |       |       |                   |                  |                                           |
|-----------------------|------------------------------|--------------------------------|--------------------------------|------------------|-------|-------|-------------------|------------------|-------------------------------------------|
|                       | SiO <sub>2</sub>             | Al <sub>2</sub> O <sub>3</sub> | Fe <sub>2</sub> O <sub>3</sub> | K <sub>2</sub> O | MgO   | CaO   | Na <sub>2</sub> O | TiO <sub>2</sub> | Others (S, P and C as an oxide compounds) |
| MMT                   | 66.90                        | 13.80                          | 2.75                           | 1.65             | 1.58  | 0.29  | 0.15              | 0.44             | 12.44                                     |
| TiO <sub>2</sub> /MMT | 28.30                        | 7.58                           | 1.55                           | 0.883            | 0.670 | 0.161 | 2.27              | 58.50            | 0.086                                     |

**Table S3.** Elemental composition of the TiO<sub>2</sub>/MMT sample.

| Element | C     | O     | Na   | Mg   | Al   | Si   | K    | Ti   | Au    | Total  |
|---------|-------|-------|------|------|------|------|------|------|-------|--------|
| Weight% | 16.71 | 12.52 | 1.17 | 0.76 | 2.28 | 5.63 | 0.84 | 7.20 | 52.89 | 100.00 |
| Atomic% | 46.67 | 26.25 | 1.71 | 1.05 | 2.82 | 6.73 | 0.72 | 5.04 | 9.01  | 100.00 |

**Table S4.** The influence of water matrix on the degradation rate constant of 20 mg L<sup>-1</sup> CIP after 30 min of photocatalytic ozonation at the ozone flow rate of 2 L h<sup>-1</sup>.

| <b>Sample</b>   | <b>CIP (mg L<sup>-1</sup>)</b> | <b>Degradation efficiency (%)</b> | <b>k<sub>app</sub> (min<sup>-1</sup>)</b> | <b>R<sup>2</sup></b> |
|-----------------|--------------------------------|-----------------------------------|-------------------------------------------|----------------------|
| Deionized water | 20                             | 90.00                             | 0.0688                                    | 0.9846               |
| Well water      | 20                             | 80.02                             | 0.0516                                    | 0.9980               |
| Ground water    | 20                             | 69.99                             | 0.0406                                    | 0.9996               |

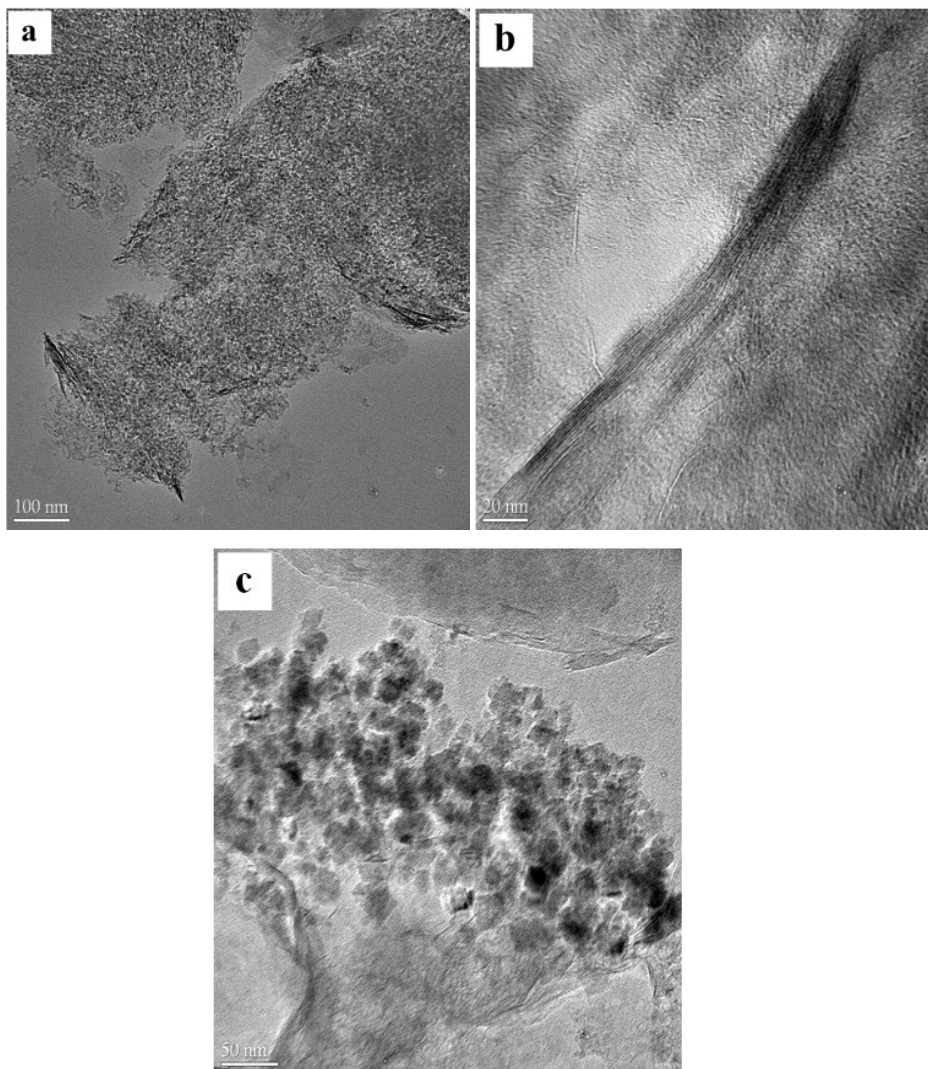

**Fig. S1.** HRTEM images of (a, b) MMT, and (c) TiO<sub>2</sub>/MMT.

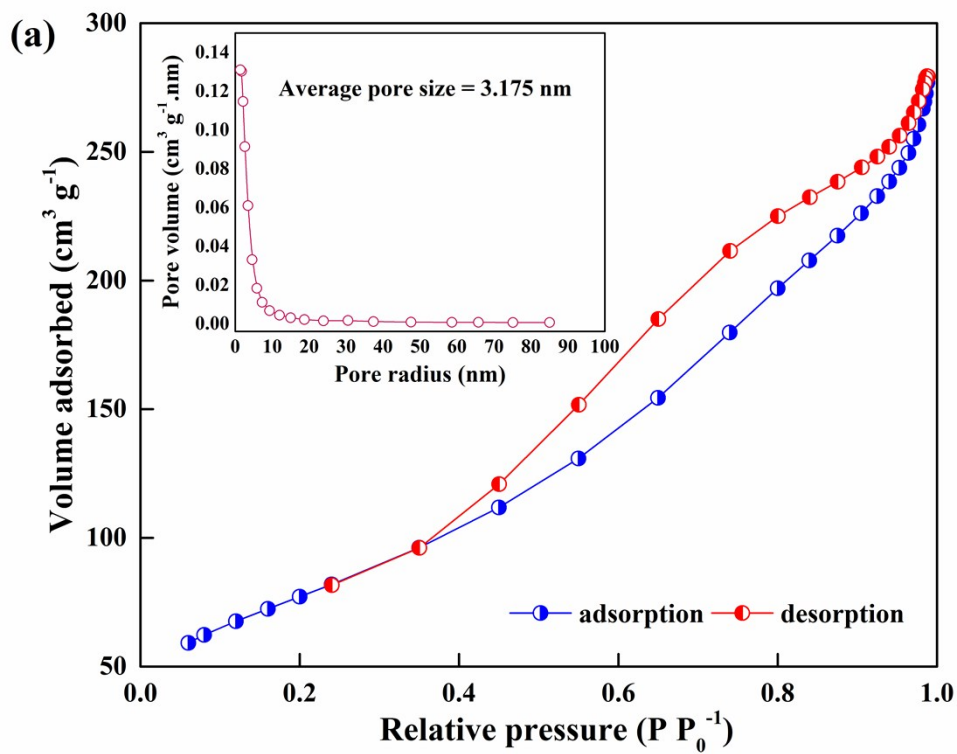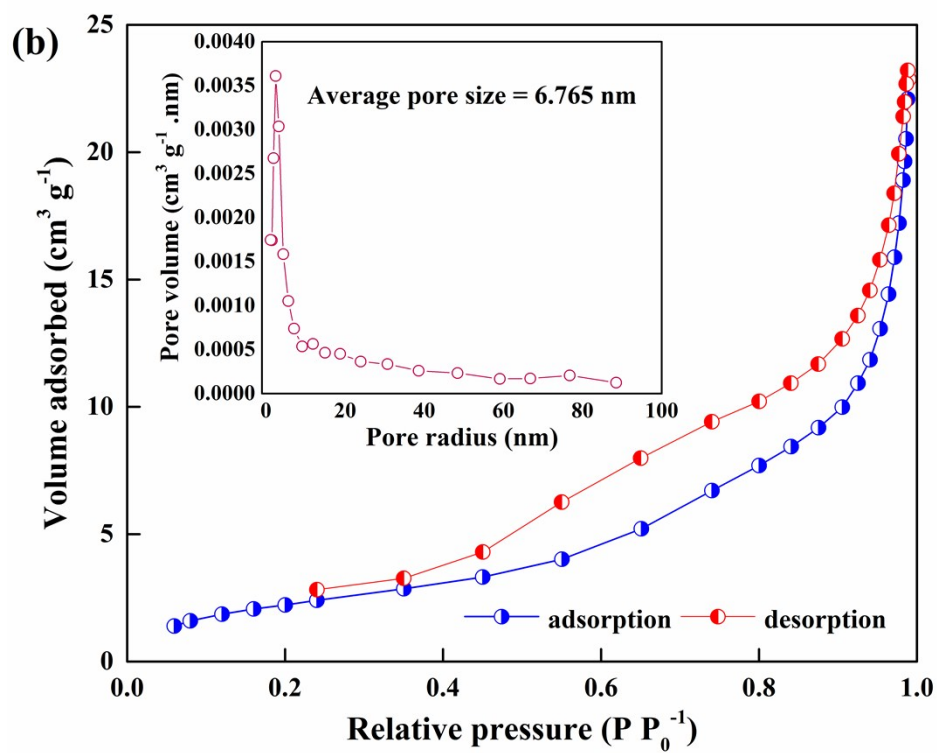

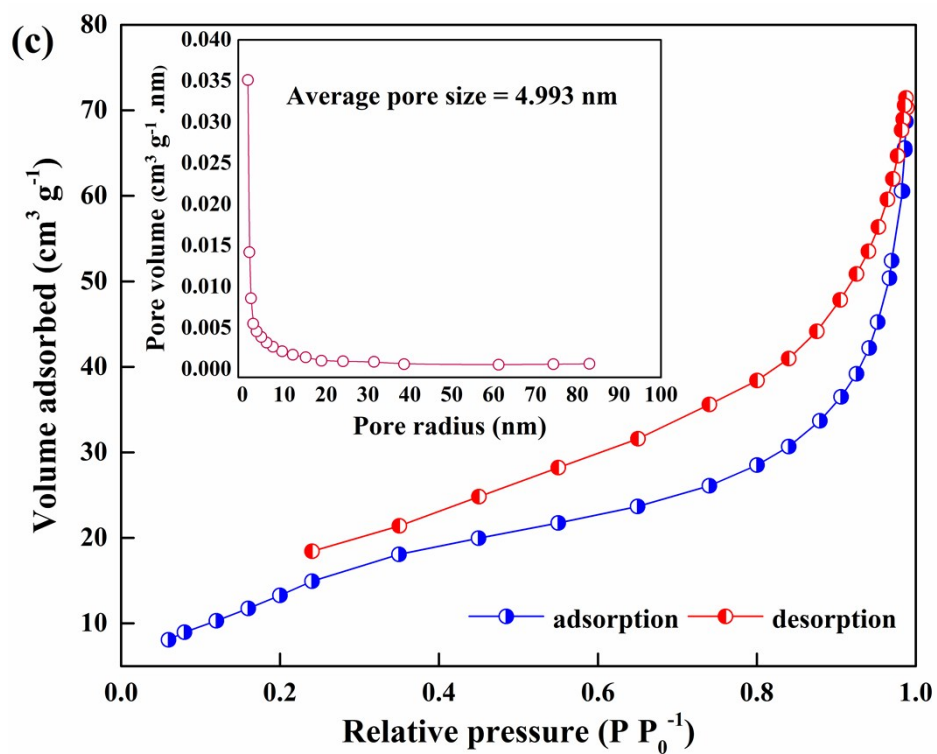

**Fig. S2.** N<sub>2</sub> adsorption-desorption BET isotherms and BJH pore size distribution curves (inset) of the samples. (a) MMT, (b) TiO<sub>2</sub>, and (c) TiO<sub>2</sub>/MMT.



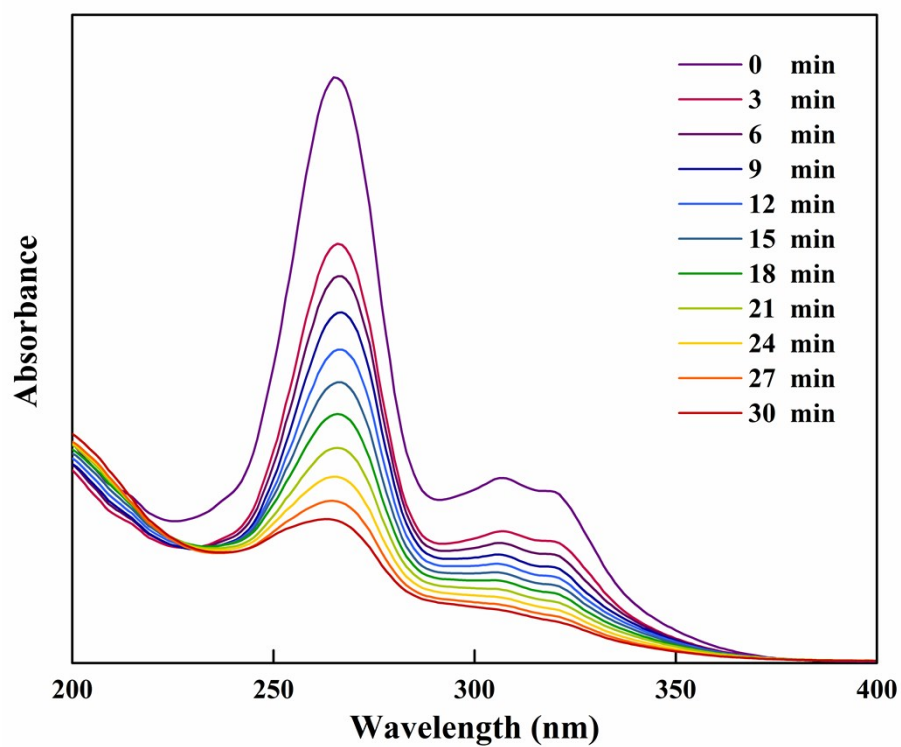

**Fig. S3.** The changes in the absorption spectra of 20 mg L<sup>-1</sup> CIP solution during 30 min of the photocatalytic ozonation process. [Catalyst]<sub>0</sub> = 0.04 g L<sup>-1</sup>, [CIP]<sub>0</sub> = 20 mg L<sup>-1</sup>, ozone gas flow rate = 2 L h<sup>-1</sup>, pH = 5.
